# Supplementary material for: Evaluating Acylsugars-Mediated Resistance in Tomato against Bemisia tabaci and Transmission of Tomato Yellow Leaf Curl Virus
Source: MDPI journal article supplement (doi:10.3390/insects11120842), 2020-11-28

**Supplementary Table S1**
**Table S1.** Type III statistics associated with fatty acids percentage from acylsugar lines.

| <b>Fatty Acids<sup>a</sup></b> | <b>Num. DF</b> | <b>Den. DF</b> | <b>F</b> | <b><i>p</i></b> |
|--------------------------------|----------------|----------------|----------|-----------------|
| i-C4                           | 4              | 30             | 44.10    | <0.0001         |
| ai-C5                          | 4              | 30             | 10.74    | <0.0001         |
| i-C5                           | 4              | 30             | 25.57    | <0.0001         |
| ai-C6                          | 4              | 30             | 6.36     | 0.0012          |
| i-C6                           | 4              | 30             | 2.31     | 0.0871          |
| i-C9                           | 4              | 30             | 95.54    | <0.0001         |
| i-C10                          | 4              | 30             | 32.94    | <0.0001         |
| n-C10                          | 4              | 30             | 139.33   | <0.0001         |
| ai-C11                         | 4              | 30             | 238.19   | <0.0001         |
| iC-11                          | 4              | 30             | 173.09   | <0.0001         |
| nC-11                          | 4              | 30             | 1.62     | 0.2013          |
| iC-12                          |                |                | 3.51     | 0.0216          |
| nC-12                          | 4              | 30             | 66.21    | <0.0001         |
| i-C13                          |                |                | 488.23   | <0.0001         |
| i-C14                          | 4              | 30             | 139.33   | <0.0001         |

\* Fatty acids in terms of proportions from five tomato acylsugar tomato accessions are presented.

## Supplementary Table S2

**Table S2.** Type III statistics on whitefly settling assays to assess differences between hosts and leaf surfaces.

| FL47 vs. Cu071026             |              |                |         |         |
|-------------------------------|--------------|----------------|---------|---------|
| Effect                        | Numerator Df | Denominator DF | F value | p       |
| Host                          | 1            | 11             | 10.21   | 0.0085  |
| Leaf surface                  | 1            | 22             | 38.15   | <0.0001 |
| Host *leaf surface            | 1            | 22             | 123.77  | <0.0001 |
| FL47 vs. FA2/CU071026         |              |                |         |         |
| Host                          | 1            | 11             | 1.13    | 0.0217  |
| Leaf surface                  | 1            | 22             | 31.35   | <0.0001 |
| Host *leaf surface            | 1            | 22             | 32.36   | <0.0001 |
| FL47 vs. FA7/CU071026         |              |                |         |         |
| Host                          | 1            | 11             | 7.14    | 0.0217  |
| Leaf surface                  | 1            | 22             | 20.73   | 0.0002  |
| Host *leaf surface            | 1            | 22             | 24.14   | <0.0001 |
| FL47 vs. FA2/FA7/CU071026     |              |                |         |         |
| Host                          | 1            | 11             | 4.15    | 0.0665  |
| Leaf surface                  | 1            | 22             | 24.08   | <0.0001 |
| Host *leaf surface            | 1            | 22             | 24.25   | <0.0001 |
| FL47 vs. QTL6/CU071026        |              |                |         |         |
| Host                          | 1            | 11             | 10.19   | 0.0086  |
| Leaf surface                  | 1            | 22             | 13.01   | 0.0016  |
| Host *leaf surface            | 1            | 22             | 36.35   | <0.0001 |
| Cu071026 vs. FA2/CU071026     |              |                |         |         |
| Host                          | 1            | 11             | 0.02    | 0.8865  |
| Leaf surface                  | 1            | 22             | 0.10    | 0.7576  |
| Host *leaf surface            | 1            | 22             | 2.09    | 0.1619  |
| Cu071026 vs. FA7/CU071026     |              |                |         |         |
| Host                          | 1            | 11             | 0.00    | 0.9940  |
| Leaf surface                  | 1            | 22             | 8.13    | 0.0093  |
| Host *leaf surface            | 1            | 22             | 3.47    | 0.0757  |
| Cu071026 vs. FA2/FA7/CU071026 |              |                |         |         |
| Host                          | 1            | 11             | 0.03    | 0.8636  |
| Leaf surface                  | 1            | 22             | 6.46    | 0.0186  |
| Host *leaf surface            | 1            | 22             | 1.57    | 0.2227  |
| Cu071026 vs. QTL6/CU071026    |              |                |         |         |
| Host                          | 1            | 11             | 0.14    | 0.7138  |
| Leaf surface                  | 1            | 22             | 1.45    | 0.2419  |
| Host *leaf surface            | 1            | 22             | 0.55    | 0.4650  |

Settling assays were conducted to distinguish differences between non-acylsugar tomato cultivar and acylsugar-producing lines, and also between the benchmark acylsugar line CU071026 and other recently derived acylsugar-producing lines. Host in the table refers to both non-acylsugar cultivar and acylsugar-producing lines. Leaf surface refers to both abaxial (lower) and adaxial (upper) leaf surfaces.

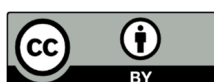

Supplement: s1 [file s1]
